# Supplementary material for: Broadcasters, receivers, functional groups of metabolites and the link to heart failure progression using polygenic factors
Source: Research Square preprint supplement (doi:10.21203/rs.3.rs-3246406/v1), 2023-08-18
Supplement: Supplementary file 1 [file 494387eee1cc5e576d5390c8.xlsx]

## Sheet: FHS_OS_metabolites
Method	Representative metabolite class	Nomenclature	HMDB_ID	HMDB_ID_specificity (1=match, 2=representative)
targeted HILIC-pos	amino acids	Alanine	HMDB0000161	1
targeted HILIC-pos	amino acids	Asparagine	HMDB0000168	1
targeted HILIC-pos	amino acids	Arginine	HMDB0000517	1
targeted HILIC-pos	amino acids	Glutamic acid	HMDB0000148	1
targeted HILIC-pos	amino acids	Glutamine	HMDB0000641	1
targeted HILIC-pos	amino acids	Glycine	HMDB0000123	1
targeted HILIC-pos	amino acids	Histidine	HMDB0000177	1
targeted HILIC-pos	amino acids	Isoleucine	HMDB0000172	1
targeted HILIC-pos	amino acids	Leucine	HMDB0000687	1
targeted HILIC-pos	amino acids	Lysine	HMDB0000182	1
targeted HILIC-pos	amino acids	Methionine	HMDB0000696	1
targeted HILIC-pos	amino acids	Phenylalanine	HMDB0000159	1
targeted HILIC-pos	amino acids	Proline	HMDB0000162	1
targeted HILIC-pos	amino acids	Serine	HMDB0000187	1
targeted HILIC-pos	amino acids	Threonine	HMDB0000167	1
targeted HILIC-pos	amino acids	Tryptophan	HMDB0000929	1
targeted HILIC-pos	amino acids	Tyrosine	HMDB0000158	1
targeted HILIC-pos	amino acids	Valine	HMDB0000883	1
targeted HILIC-pos	amino acids	Creatine	HMDB0000064	1
targeted HILIC-pos	amino acids	Creatinine	HMDB0000562	1
targeted HILIC-pos	amino acids	Xanthosine	HMDB0000299	1
targeted HILIC-pos	amino acids	Kynurenic acid	HMDB0000715	1
targeted HILIC-pos	amino acids	2-Aminobenzoic acid	HMDB0001123	1
targeted HILIC-pos	amino acids	Allantoin	HMDB0000462	1
targeted HILIC-pos	amino acids	Aminoisobutyric acid	HMDB0001906	1
targeted HILIC-pos	amino acids	Betaine	HMDB0000043	1
targeted HILIC-pos	amino acids	Choline	HMDB0000097	1
targeted HILIC-pos	amino acids	Dimethylglycine	HMDB0000092	1
targeted HILIC-pos	amino acids	Trimethylamine N-oxide	HMDB0000925	1
targeted HILIC-pos	amino acids	Citrulline	HMDB0000904	1
targeted HILIC-pos	amino acids	Ornithine	HMDB0000214	1
targeted HILIC-pos	amino acids	Carnitine	HMDB0000062	1
targeted HILIC-pos	amino acids	Hydroxyproline	HMDB0000725	1
targeted HILIC-pos	amino acids	Targinine	HMDB0029416	1
targeted HILIC-pos	amino acids	sn-Glycero-3-phosphocholine	HMDB0000086	1
targeted HILIC-pos	amino acids	Ureidopropionic acid	HMDB0000026	1
targeted HILIC-pos	amino acids	Niacinamide	HMDB0001406	1
targeted HILIC-pos	amino acids	Taurine	HMDB0000251	1
targeted HILIC-pos	amino acids	Thiamine	HMDB0000235	1
targeted HILIC-pos	amino acids	Thyroxine	HMDB0000248	1
targeted HILIC-pos	amino acids	Serotonin	HMDB0000259	1
targeted HILIC-pos	amino acids	5-Hydroxyindoleacetic acid	HMDB0000763	1
targeted HILIC-neg	bile acid, organic acid, nucleotide, sugar	Aminoadipic acid	HMDB0000510	1
targeted HILIC-neg	bile acid, organic acid, nucleotide, sugar	2-Phosphoglyceric acid or 3-Phosphoglyceric acid	HMDB0000807	2
targeted HILIC-neg	bile acid, organic acid, nucleotide, sugar	sn-Glycero-3-phosphate	HMDB0000126	1
targeted HILIC-neg	bile acid, organic acid, nucleotide, sugar	cis-Aconitic acid	HMDB0000072	1
targeted HILIC-neg	bile acid, organic acid, nucleotide, sugar	Adipic acid	HMDB0000448	1
targeted HILIC-neg	bile acid, organic acid, nucleotide, sugar	AMP	HMDB0000045	1
targeted HILIC-neg	bile acid, organic acid, nucleotide, sugar	ADP	HMDB0001341	1
targeted HILIC-neg	bile acid, organic acid, nucleotide, sugar	Citric acid	HMDB0000094	1
targeted HILIC-neg	bile acid, organic acid, nucleotide, sugar	Isocitric acid	HMDB0000193	1
targeted HILIC-neg	bile acid, organic acid, nucleotide, sugar	Hexose monophosphate	HMDB0000124	2
targeted HILIC-neg	bile acid, organic acid, nucleotide, sugar	Hexose	HMDB0000122	2
targeted HILIC-neg	bile acid, organic acid, nucleotide, sugar	Fumaric acid or Maleic acid	HMDB0000134	2
targeted HILIC-neg	bile acid, organic acid, nucleotide, sugar	Glucuronic acid	HMDB0000127	1
targeted HILIC-neg	bile acid, organic acid, nucleotide, sugar	Hippuric acid	HMDB0000714	1
targeted HILIC-neg	bile acid, organic acid, nucleotide, sugar	Kynurenine	HMDB0000684	1
targeted HILIC-neg	bile acid, organic acid, nucleotide, sugar	Lactic acid	HMDB0000190	1
targeted HILIC-neg	bile acid, organic acid, nucleotide, sugar	Lactose	HMDB0000186	1
targeted HILIC-neg	bile acid, organic acid, nucleotide, sugar	Malic acid	HMDB0000156	1
targeted HILIC-neg	bile acid, organic acid, nucleotide, sugar	Pantothenic acid	HMDB0000210	1
targeted HILIC-neg	bile acid, organic acid, nucleotide, sugar	Quinolinic acid	HMDB0000232	1
targeted HILIC-neg	bile acid, organic acid, nucleotide, sugar	Sorbitol	HMDB0000247	1
targeted HILIC-neg	bile acid, organic acid, nucleotide, sugar	Sucrose	HMDB0000258	1
targeted HILIC-neg	bile acid, organic acid, nucleotide, sugar	Uric acid	HMDB0000289	1
targeted HILIC-neg	bile acid, organic acid, nucleotide, sugar	Uridine	HMDB0000296	1
targeted HILIC-neg	bile acid, organic acid, nucleotide, sugar	Glycocholic acid	HMDB0000138	1
targeted HILIC-neg	bile acid, organic acid, nucleotide, sugar	Glycodeoxycholic acid or Glycochenodeoxycholic acid	HMDB0000631	2
targeted HILIC-neg	bile acid, organic acid, nucleotide, sugar	Gentisic acid	HMDB0000152	1
targeted HILIC-neg	bile acid, organic acid, nucleotide, sugar	Phosphocreatine	HMDB0001511	1
targeted HILIC-neg	bile acid, organic acid, nucleotide, sugar	3-Methyladipic acid or Pimelic acid	HMDB0000555	2
targeted HILIC-neg	bile acid, organic acid, nucleotide, sugar	2-Hydroxybutyric acid	HMDB0000008	1
targeted HILIC-neg	bile acid, organic acid, nucleotide, sugar	3-Hydroxybutyric acid	HMDB0000011	1
targeted HILIC-neg	bile acid, organic acid, nucleotide, sugar	2-Hydroxyglutaric acid	HMDB0000694	1
targeted HILIC-neg	bile acid, organic acid, nucleotide, sugar	Indoxyl sulfate	HMDB0000682	1
targeted HILIC-neg	bile acid, organic acid, nucleotide, sugar	4-Pyridoxic acid	HMDB0000017	1
targeted HILIC-neg	bile acid, organic acid, nucleotide, sugar	Oxalic acid	HMDB0002329	1
targeted HILIC-neg	bile acid, organic acid, nucleotide, sugar	Xanthurenic acid	HMDB0000881	1
targeted HILIC-neg	bile acid, organic acid, nucleotide, sugar	Chenodeoxycholic acid or Deoxycholic acid	HMDB0000626	2
targeted HILIC-neg	bile acid, organic acid, nucleotide, sugar	Salicyluric acid	HMDB0000840	1
targeted HILIC-neg	bile acid, organic acid, nucleotide, sugar	p-Hydroxyphenylacetic acid	HMDB0000020	1
targeted HILIC-neg	bile acid, organic acid, nucleotide, sugar	Taurodeoxycholic acid or Taurochenodeoxycholic acid	HMDB0000896	2
targeted HILIC-neg	bile acid, organic acid, nucleotide, sugar	Xanthine	HMDB0000292	1
targeted HILIC-neg	bile acid, organic acid, nucleotide, sugar	Phosphoenolpyruvic acid	HMDB0000263	1
targeted HILIC-neg	bile acid, organic acid, nucleotide, sugar	Inosine	HMDB0000195	1
targeted HILIC-neg	bile acid, organic acid, nucleotide, sugar	3-Indolepropionic acid	HMDB0002302	1
targeted HILIC-neg	bile acid, organic acid, nucleotide, sugar	Myo-inositol	HMDB0000211	1
targeted HILIC-neg	bile acid, organic acid, nucleotide, sugar	UDP-galactose or UDP-glucose	HMDB0000302	2
targeted HILIC-neg	bile acid, organic acid, nucleotide, sugar	Pentose 5-phosphate	HMDB0001548	2
targeted HILIC-neg	bile acid, organic acid, nucleotide, sugar	Cystathionine	HMDB0000099	1
targeted HILIC-neg	bile acid, organic acid, nucleotide, sugar	Hypoxanthine	HMDB0000157	1
targeted HILIC-neg	bile acid, organic acid, nucleotide, sugar	Orotic acid	HMDB0000226	1
targeted HILIC-neg	bile acid, organic acid, nucleotide, sugar	Oxoglutaric acid	HMDB0000208	1
targeted HILIC-neg	bile acid, organic acid, nucleotide, sugar	GMP	HMDB0001397	1
targeted HILIC-neg	bile acid, organic acid, nucleotide, sugar	Propionic acid	HMDB0000237	1
targeted HILIC-neg	bile acid, organic acid, nucleotide, sugar	GDP	HMDB0001201	1
C4-pos	lipids	LPC 14:0	HMDB0010379	1
C4-pos	lipids	LPC 16:1	HMDB0010383	2
C4-pos	lipids	LPC 16:0	HMDB0010382	1
C4-pos	lipids	LPC 18:2	HMDB0010386	2
C4-pos	lipids	LPC 18:1	HMDB0002815	2
C4-pos	lipids	LPC 18:0	HMDB0010384	1
C4-pos	lipids	LPC 20:5	HMDB0010397	1
C4-pos	lipids	LPC 20:4	HMDB0010395	1
C4-pos	lipids	LPC 20:3	HMDB0010393	2
C4-pos	lipids	LPC 22:6	HMDB0010404	1
C4-pos	lipids	LPE 16:0	HMDB0011503	1
C4-pos	lipids	LPE 18:2	HMDB0011507	2
C4-pos	lipids	LPE 18:1	HMDB0011475	2
C4-pos	lipids	LPE 18:0	HMDB0011130	1
C4-pos	lipids	LPE 20:4	HMDB0011517	1
C4-pos	lipids	LPE 22:6	HMDB0011526	1
C4-pos	lipids	PC 32:2	HMDB0007874	2
C4-pos	lipids	PC 32:1	HMDB0007873	2
C4-pos	lipids	PC 32:0	HMDB0007871	2
C4-pos	lipids	PC 34:4	HMDB0007883	2
C4-pos	lipids	PC 34:3	HMDB0008006	2
C4-pos	lipids	PC 34:2	HMDB0007973	2
C4-pos	lipids	PC 34:1	HMDB0007972	2
C4-pos	lipids	PC 36:4_A	HMDB0007983	2
C4-pos	lipids	PC 36:4_B	HMDB0007983	2
C4-pos	lipids	PC 36:3	HMDB0008105	2
C4-pos	lipids	PC 36:2	HMDB0008039	2
C4-pos	lipids	PC 36:1	HMDB0008038	2
C4-pos	lipids	PC 38:6	HMDB0007991	2
C4-pos	lipids	PC 38:5	HMDB0008114	2
C4-pos	lipids	PC 38:4	HMDB0008048	2
C4-pos	lipids	PC 38:3	HMDB0008047	2
C4-pos	lipids	PC 38:2	HMDB0008270	2
C4-pos	lipids	PC 40:6	HMDB0008057	2
C4-pos	lipids	SM 18:1/14:0	HMDB0012097	1
C4-pos	lipids	SM 18:1/16:1	HMDB0013464	2
C4-pos	lipids	SM 18:1/16:0	HMDB0010169	1
C4-pos	lipids	SM 18:1/18:1	HMDB0012101	2
C4-pos	lipids	SM 18:1/18:0	HMDB0001348	1
C4-pos	lipids	SM 18:1/22:1	HMDB0012104	2
C4-pos	lipids	SM 18:1/22:0	HMDB0012103	1
C4-pos	lipids	SM 18:1/24:1	HMDB0012107	2
C4-pos	lipids	SM 18:1/24:0	HMDB0011697	1
C4-pos	lipids	DG 34:2	HMDB0007103	2
C4-pos	lipids	DG 34:1	HMDB0007102	2
C4-pos	lipids	DG 36:2	HMDB0007218	2
C4-pos	lipids	DG 36:1	HMDB0007216	2
C4-pos	lipids	CE 14:0	HMDB0006725	1
C4-pos	lipids	CE 16:1	HMDB0000658	2
C4-pos	lipids	CE 16:0	HMDB0000885	1
C4-pos	lipids	CE 18:3	HMDB0010370	2
C4-pos	lipids	CE 18:2	HMDB0000610	2
C4-pos	lipids	CE 18:1	HMDB0000918	2
C4-pos	lipids	CE 18:0	HMDB0010368	1
C4-pos	lipids	CE 20:5	HMDB0006731	1
C4-pos	lipids	CE 20:4	HMDB0006726	1
C4-pos	lipids	CE 20:3	HMDB0006736	2
C4-pos	lipids	CE 22:6	HMDB0006733	1
C4-pos	lipids	TG 44:1	HMDB0042301	2
C4-pos	lipids	TG 46:2	HMDB0010419	2
C4-pos	lipids	TG 46:1	HMDB0010412	2
C4-pos	lipids	TG 46:0	HMDB0010411	2
C4-pos	lipids	TG 48:4	HMDB0042811	2
C4-pos	lipids	TG 48:3	HMDB0005432	2
C4-pos	lipids	TG 48:2	HMDB0005376	2
C4-pos	lipids	TG 48:1	HMDB0005359	2
C4-pos	lipids	TG 48:0	HMDB0005356	2
C4-pos	lipids	TG 50:5	HMDB0010471	2
C4-pos	lipids	TG 50:4	HMDB0005435	2
C4-pos	lipids	TG 50:3	HMDB0005433	2
C4-pos	lipids	TG 50:2	HMDB0005377	2
C4-pos	lipids	TG 50:1	HMDB0005360	2
C4-pos	lipids	TG 52:6	HMDB0005436	2
C4-pos	lipids	TG 52:5	HMDB0005380	2
C4-pos	lipids	TG 52:4	HMDB0005363	2
C4-pos	lipids	TG 52:3	HMDB0005384	2
C4-pos	lipids	TG 52:2	HMDB0005369	2
C4-pos	lipids	TG 52:1	HMDB0005367	2
C4-pos	lipids	TG 54:9	HMDB0010498	2
C4-pos	lipids	TG 54:8	HMDB0010518	2
C4-pos	lipids	TG 54:7	HMDB0005447	2
C4-pos	lipids	TG 54:6	HMDB0005391	2
C4-pos	lipids	TG 54:5	HMDB0005385	2
C4-pos	lipids	TG 54:4	HMDB0005370	2
C4-pos	lipids	TG 54:3	HMDB0005405	2
C4-pos	lipids	TG 54:2	HMDB0005403	2
C4-pos	lipids	TG 54:1	HMDB0005395	2
C4-pos	lipids	TG 56:10	HMDB0010513	2
C4-pos	lipids	TG 56:9	HMDB0005448	2
C4-pos	lipids	TG 56:8	HMDB0005392	2
C4-pos	lipids	TG 56:7	HMDB0005462	2
C4-pos	lipids	TG 56:6	HMDB0005456	2
C4-pos	lipids	TG 56:5	HMDB0005406	2
C4-pos	lipids	TG 56:4	HMDB0005398	2
C4-pos	lipids	TG 56:3	HMDB0005410	2
C4-pos	lipids	TG 56:2	HMDB0005404	2
C4-pos	lipids	TG 58:12	HMDB0010514	2
C4-pos	lipids	TG 58:11	HMDB0010531	2
C4-pos	lipids	TG 58:10	HMDB0005476	2
C4-pos	lipids	TG 58:9	HMDB0005463	2
C4-pos	lipids	TG 58:8	HMDB0005413	2
C4-pos	lipids	TG 58:7	HMDB0005471	2
C4-pos	lipids	TG 58:6	HMDB0005458	2
C4-pos	lipids	TG 60:12	HMDB0005478	2
